# Supplementary material
Source: publisher figshare collection journal article supplement (https://tandf.figshare.com/ndownloader/files/14367422)
Supplement: Supplementary file 1 [file 14367422]

Supplementary Table 1

Intra- and inter-rater reliability

| Behavior | Intra-rater | | | Inter-rater | | |
| --- | --- | --- | --- | --- | --- | --- |
|  | R | ß0 | ß1 | R | ß0 | ß1 |
| Coprophagy (frequency, N = 34 values) | 1.000 | 0.000 | 1.000 | 1.000 | 0.000 | 1.000 |
| At fence (frequency, N = 34 values) | 0.999 | −0.004 | 0.993 | 0.997 | 0.160 | 0.957 |
| Social play (frequency, N = 19 values) | 1.000 | 0.000 | 1.000 | 1.000 | 0.000 | 1.000 |
| Exploration (frequency, N = 19 values) | 0.988 | 0.012 | 1.042 | 0.988 | 0.012 | 1.042 |
| Other activity (frequency, N = 19 values) | 0.998 | −0.159 | 1.012 | 0.997 | −0.078 | 1.028 |
| Inactivity (frequency, N = 19 values) | 1.000 | 0.000 | 1.000 | 1.000 | 0.000 | 1.000 |

Bivariate correlation after Bravais–Pearson linear regression: intercept ß0, regression coefficient ß1
